# Supplementary material for: Targeting the Ubiquitin–Proteasome System Using the UBA1 Inhibitor TAK-243 is a Potential Therapeutic Strategy for Small-Cell Lung Cancer
Source: PubMed Central journal article supplement — Clin Cancer Res. 2022 Feb 11;28(9):1966–78. doi: 10.1158/1078-0432.CCR-21-0344 (PMC9365348; doi:10.1158/1078-0432.ccr-21-0344), 2022-02-11
Supplement: ccr-21-0344_supplementary_methods_supps0.pdf [file ccr-21-0344_supplementary_methods_supps0.pdf]

## Supplementary Methods

### Cell-line testing

Mycoplasma testing was conducted for 15 of 19 cell-lines not purchased from the American Type Culture Collection (ATCC) within the last 6 months. Briefly, 50µL MycoAlert™ Plus reagent was added to 50uL cell culture medium supernatant and read after 5 mins using a microplate reader (CLARIOstar, BMG LABTECH) to generate Readout A. 50µL MycoAlert™ Plus substrate was added, cells were incubated on a shaker at room temperature for 10 mins, and then read using the described method to generate readout B. The ratio of readout B/A was used to determine presence of mycoplasma (cell-lines with a ratio between 0.9 and 1.2 were quarantined for 24 hours and retested); a ratio less than 0.9 was considered as negative for mycoplasma.

STR DNA profiling was conducted to authenticate cell-lines (14 of 19 cell-lines not purchased from the ATCC within the last 6 months). DNA from cell-lines was purified using QIAquick PCR Purification Kit (purchased from Qiagen, catalog# 28104). Purified DNA was then sent to the Centre for Applied Genomics at the SickKids Hospital (Toronto, ON, Canada) for testing.

Cell-lines received from ATCC were not further tested (ie: for mycoplasma or STR) as they were cultured and assayed within 6 months of purchase. The ATCC ensures authentication of human cell-lines through STR profiling and mycoplasma testing.

## **Immunoblotting and apoptosis assessment**

The cells were treated with 0.5 $\mu$ M and 1 $\mu$ M of TAK-243 for 24 hours, washed with PBS and lysed using RIPA buffer. The cell lysate was centrifuged at 21,000g for 45 min at 4°C and supernatant was collected. Proteins were separated from the supernatant on 8% SDS–polyacrylamide gel using the Tricine buffer system. The proteins were then transferred onto the PVDF membrane at 20V for 16-20 hours at 4°C. After blocking with 3% BSA in TBST for 1 hour at room temperature, the membrane was incubated with anti-PARP1 (cat#: sc-8007, 1:500, Santa Cruz), anti-cleaved PARP (cat#: 9541S, 1:1000, CST) and anti- $\beta$  actin (cat#: 3700S, 1:15000, CST) at 4°C overnight. After washing with TBST thrice, the membrane was incubated with IRDye donkey-anti-rabbit 800CW (LI-COR Biosciences, P/N: 926-32213) and IRDye donkey-anti-mouse 680RD (LI-COR Biosciences, P/N: 926-68072) secondary antibodies. Near-infrared imaging (LI-COR; Odyssey) was performed and bands were quantified using ImageStudio (LI-COR; version 5.2.5). After normalizing the bands with  $\beta$ -actin for loading control, the ratio of PARP1 to cleaved-PARP was calculated.

## **Cell viability assays**

The drug response of 26 SCLC cell-lines was assessed using the CellTiter Glo 2.0 assay (Promega, #G9243). Briefly, cell-lines were plated in 384 well plates using the automated Thermo Scientific Multidrop Combi Reagent Dispenser (#5840300). Once cells were plated, drugs were added (TAK-243, range: 0-1  $\mu$ M; Cisplatin/Etoposide 1:1 ratio, range: 0-10  $\mu$ M; olaparib, range 0.013-500  $\mu$ M) using the Tecan D300e Digital Dispenser. DMSO and staurosporine (10mM) were used as the vehicle (100% viability)

and kill positive (100% cell death, for background normalization) controls, respectively in all cell-viability experiments. Plates were incubated at 37°C in a humidified CO<sub>2</sub> incubator for 3 days. Cell viability was assessed using the Celltiter Glo 2.0 by measuring luminescence a microplate reader (CLARIOstar, BMG LABTECH).

To evaluate drug synergy between TAK-243 and C/E, cell-lines were seeded in 384 well plates and treated with 144 cell-line specific concentration combinations of TAK-243 and C/E (1:1 ratio of C/E) to result in a 12 by 12 dose-response matrix. The drug combinations of TAK-243 (0.00026 - 2µM) and C/E (0.0055 - 15µM) were chosen for each cell-line based on their specific single agent sensitivity to each drug individually, with stepwise log-fold increments between doses. Similarly, to evaluate drug synergy between TAK-243 and olaparib, cell-lines were seeded in 384 well plates and treated with 56 concentration combinations of TAK-243 (0.00026 - 1µM) and olaparib (0.013 - 250µM) in triplicates to result in an 8 by 7 dose-response matrix. For synergy experiments, cell viability was assessed using the alamarBlue resazurin conversion assay (ThermoFisher Scientific, #DAL1025) by measuring fluorescence after six days of drug exposure using a microplate reader (CLARIOstar, BMG LABTECH).

### ***In vivo studies***

Patient-derived xenograft (PDX) dissociated tumor cells were passaged in accordance with previous methodologies<sup>1,2</sup>. Once tumors reached an average starting tumor volume between 100-200mm<sup>3</sup>, animals were randomized into experimental or control groups. Mouse weight and tumour volumes were measured biweekly using a digital caliper and scale. Tumour volumes (TV) were calculated by the following equation:

TV =  $xy^2(0.52)$ . All animals were euthanized once a tumour endpoint of 1000mm<sup>3</sup> (volume) or 1.5cm (length) was reached or if any other humane endpoint was observed as recommended by the Animal Resource Centre veterinarian.

## Statistical Analysis

### *Dose response analysis*

Drug dose response was modelled by the LL.4 four-parameter log-logistic function:

$$f(x(b, c, d, e)) = c + \frac{d - c}{1 + \exp(b(\log(x) - \log(e)))}$$

using the *drc* analysis package (version 3.0-1)<sup>3</sup> in RStudio. *b* denotes the steepness of the dose-response curve, *c* and *d* represent the lower and upper limits of the response, and *e* is the half-maximal effective dose (EC50).

To evaluate TAK-243 single agent activity, cell survival was calculated relative to control cells (treated with DMSO and considered as 100% viable) and to kill positive cells treated with staurosporine (considered to have 0% survival). If large discrepancies between control readouts were observed due to edge-effect, wells treated with the lowest concentration of TAK-243 (0.25-0.5nM) were considered 100% viable. Outliers were excluded from analysis.

For single agent analysis, the upper limit of dose response curves was set to 100%, while no limit constraints were initially specified to generate curves for combination experiments. For combination experiments, dose response of cell-lines was reanalyzed by calculating cell survival relative to the survival of wells treated only with the single agent of the fixed drug (i.e. TAK-243 or C/E alone), to account for additive drug interactions.

The AUC of this normalized response was determined.  $\Delta$ AUC was measured using the following equation:

$$\Delta\text{AUC} = \frac{(\text{AUC}_{\text{Single agent}} - \text{Normalized AUC}_{\text{combination}})}{\text{AUC}_{\text{Single agent}}} \times 100$$

#### *Kaplan Meier survival analysis*

Adjusted *p*-values using the Benjamini-Hochberg method were utilized when comparing multiple Kaplan-Meier survival curves.

#### **References:**

1. Daniel, V. C. *et al.* A primary xenograft model of small-cell lung cancer reveals irreversible changes in gene expression imposed by culture in vitro. *Cancer Res.* **69**, 3364–3373 (2009).
2. Hann, C. L. *et al.* Therapeutic efficacy of ABT-737, a selective inhibitor of BCL-2, in small cell lung cancer. *Cancer Res.* **68**, 2321–2328 (2008).
3. Ritz, C., Baty, F., Streibig, J. C. & Gerhard, D. Dose-response analysis using R. *PLoS One* **10**, (2015).
